# Supplementary material for: Deprotonation- and TICT-triggered ultra-large Stokes shift of aqueous NIR-emissive hydroxylstryryl-pyridinium derivatives
Source: Royal Society of Chemistry journal article supplement (doi:10.1039/d6ra02237e), 2026-04-14
Supplement: d6ra02237e1.pdf [file d6ra02237e1.pdf]

## Electronic Supplementary Information

### Deprotonation-Triggered Ultra-large Stokes Shift of Aqueous

### NIR-Emissive Hydroxylstryryl-Pyridinium Derivatives

Xiaolong Lu<sup>a,b,c</sup>, Liyu Xiong<sup>b,c</sup>, Zhihan Zhang<sup>b,c</sup>, Haolong Yang<sup>b,c</sup>, Enmin Li<sup>d,e,f\*</sup> and Hefeng Zhang<sup>b,c\*</sup>

- a Marine Science Institute, College of Science, Shantou University, Shantou 515063, China
- b Key Laboratory for Preparation and Application of Ordered Structural Materials of Guangdong Province, Department of Chemistry, College of Chemistry and Chemical Engineering, Shantou University, Shantou 515063, China
- c Guangdong Engineering Technology Research Center of Advanced Polymer Synthesis, College of Chemistry and Chemical Engineering, Shantou University, Shantou 515063, China
- d The Key Laboratory of Molecular Biology for High Cancer Incidence Coastal Chaoshan Area, Department of Biochemistry and Molecular Biology, Shantou University Medical College, Shantou 515041, Guangdong, China
- e The Laboratory for Cancer Molecular Biology, Shantou Academy Medical Sciences, Shantou 515041, China
- f Chaoshan Branch of State Key Laboratory for Esophageal Cancer Prevention and Treatment, Shantou 515063, China

E-mail: ([hfzhang@stu.edu.cn](mailto:hfzhang@stu.edu.cn), [nmli@stu.edu.cn](mailto:nmli@stu.edu.cn))

## 1 Experimental method

### *Materials and Instruments*

All materials used in the experiment were purchased from commercial suppliers and used directly without further purification. UV-vis spectra were recorded on UV-Vis-NIR Spectrophotometer (Shanghai, China, UNICO, UV-4802S). Fluorescent spectra were recorded on Steady-state Transient Photoluminescence Spectrometer. Proton and carbon nuclear magnetic resonance spectra (<sup>1</sup>H NMR and <sup>13</sup>C NMR) were recorded on Bruker AVANCE-400 MHz NMR and 100 MHz NMR spectrometer, respectively, with TMS as an internal reference. Mass spectra were measured by High-Resolution Mass Spectrometry (HRMS) (Orbitrap Exploris 120, Thermo Fisher Scientific, US). Absolute photoluminescence quantum yields (QY) of dyes were measured by using the integrating sphere method on spectrometer C11347. The reaction progress was

monitored by thin chromatography (TLC) on silica gel plates. The crude products were purified by flash column chromatography.

## 2. Supplementary tables and figures

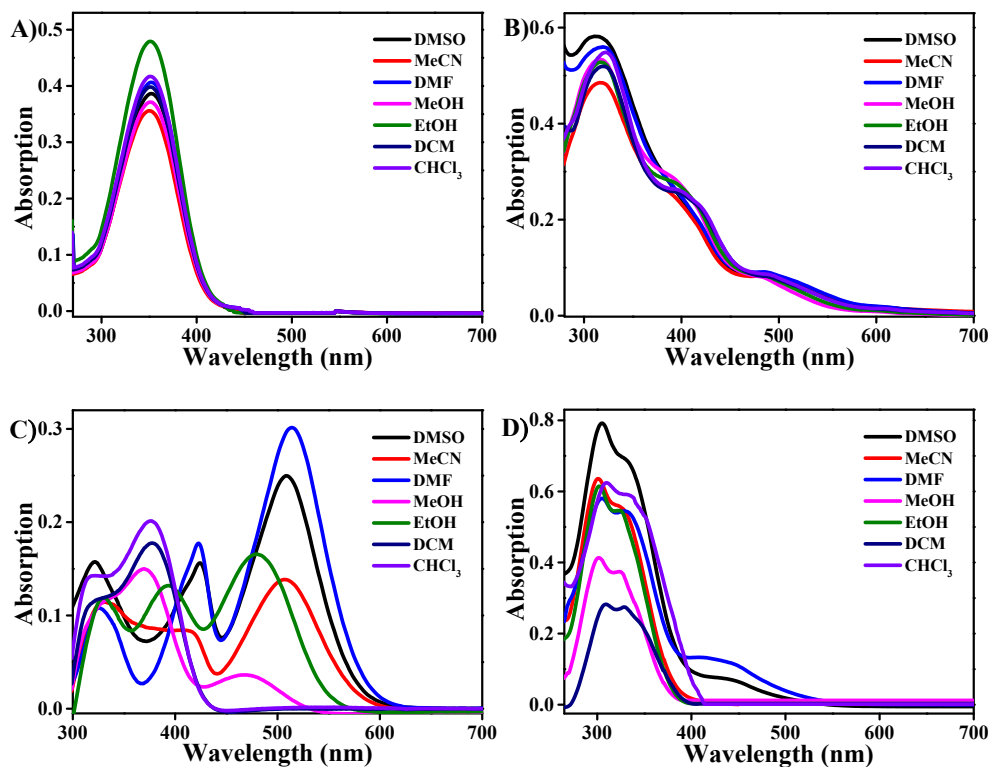

**Figure S1.** The UV-Vis absorption spectra of SP-OH dyes in different solvents ( $c = 10^{-5}$  mol/L).

A) SP-2-NO<sub>2</sub>-Py, B) SP-2-NO<sub>2</sub>-5-OMe-Py, C) SP-5-NO<sub>2</sub>-2-OH-Py, D) SP-2-NO<sub>2</sub>-5-OH-Py

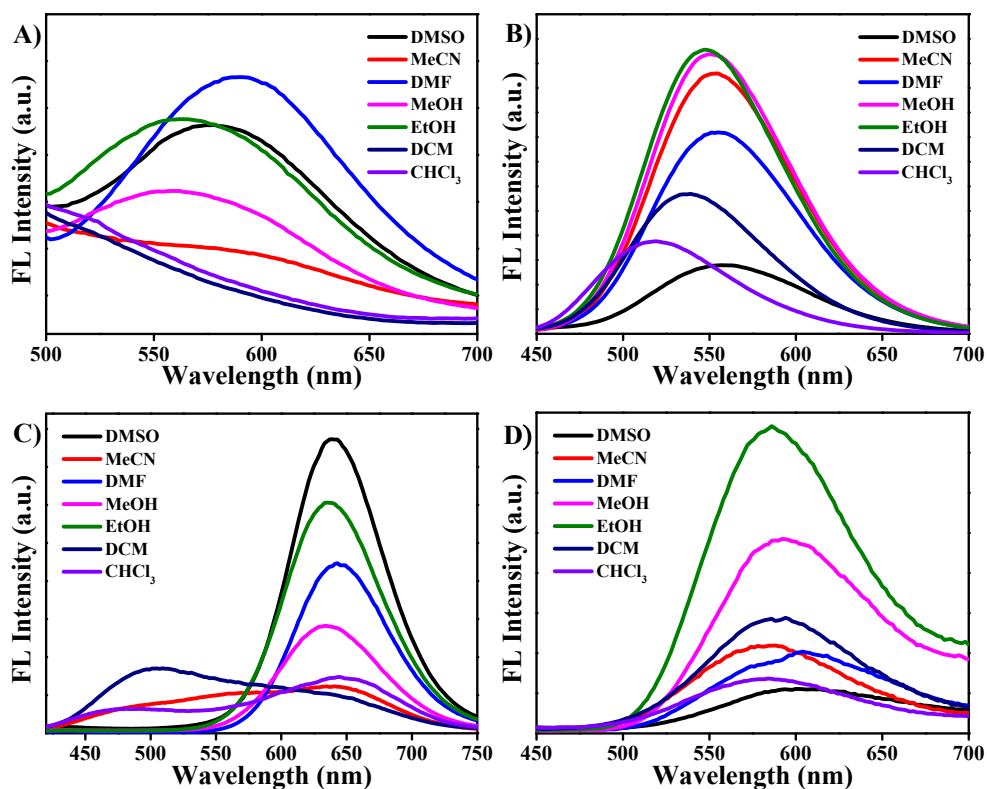

**Figure S2.** The fluorescence emission spectra of SP-OH dyes in different solvents ( $c = 10^{-5}$  mol/L).

A) SP-2-NO<sub>2</sub>-Py ( $\lambda_{\text{ex}} = 410$  nm), B) SP-2-NO<sub>2</sub>-5-OMe-Py ( $\lambda_{\text{ex}} = 393$  nm), C) SP-5-NO<sub>2</sub>-2-OH-Py ( $\lambda_{\text{ex}} = 385$  nm), D) SP-2-NO<sub>2</sub>-5-OH-Py ( $\lambda_{\text{ex}} = 420$  nm)

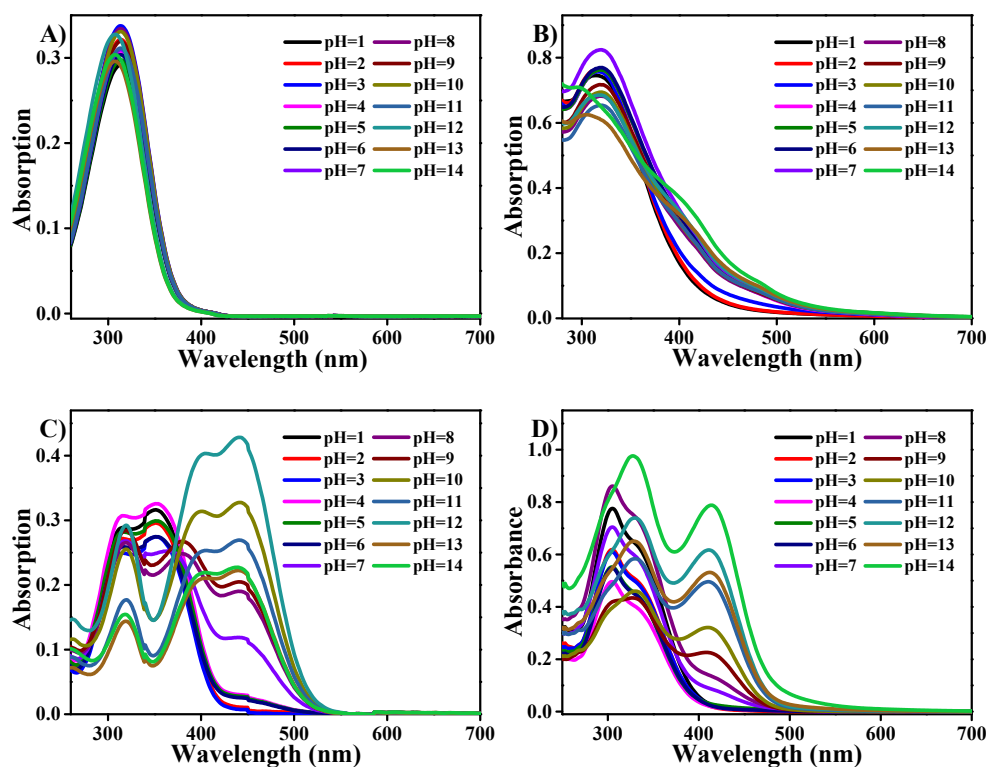

**Figure S3.** The UV-Vis absorption spectra of SP-OH dyes in different pH ( $c = 10^{-5}$  mol/L in water solution).

A) SP-2-NO<sub>2</sub>-Py, B) SP-2-NO<sub>2</sub>-5-OMe-Py, C) SP-5-NO<sub>2</sub>-2-OH-Py, D) SP-2-NO<sub>2</sub>-5-OH-Py

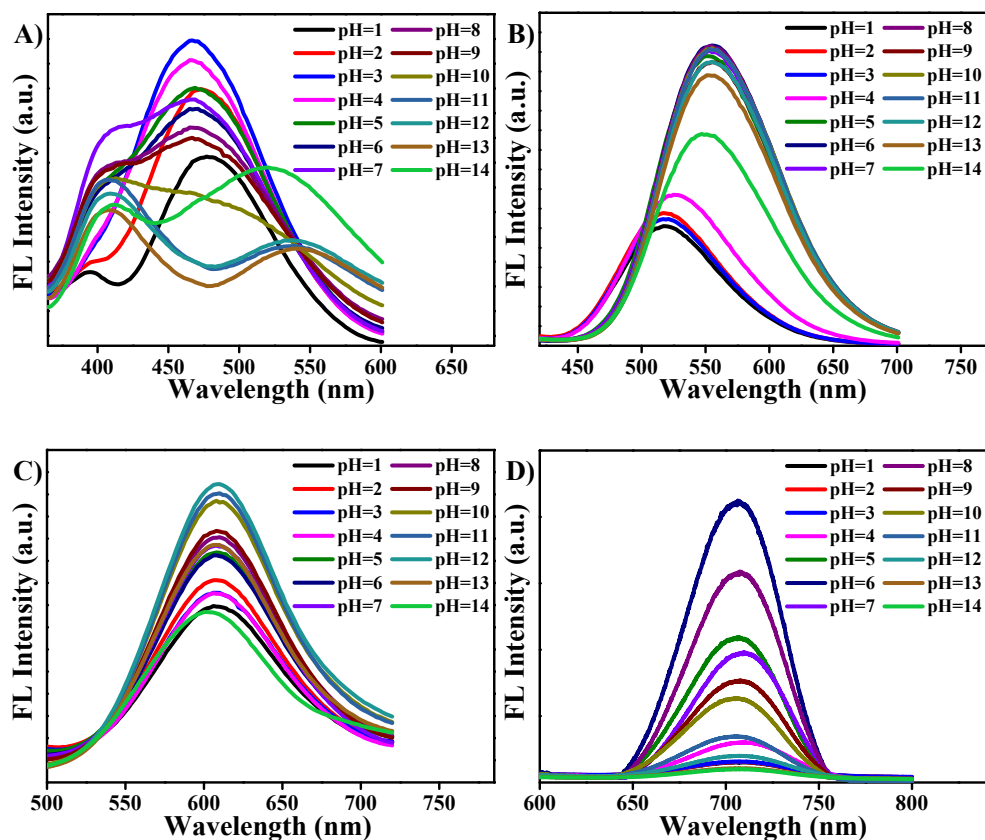

**Figure S4.** The fluorescence emission spectra of SP-OH dyes in different pH ( $c = 10^{-5}$  mol/L in water solution).

A) SP-2-NO<sub>2</sub>-Py ( $\lambda_{\text{ex}} = 345$  nm), B) SP-2-NO<sub>2</sub>-5-OMe-Py ( $\lambda_{\text{ex}} = 393$  nm), C) SP-5-NO<sub>2</sub>-2-OH-Py ( $\lambda_{\text{ex}} = 380$  nm), D) SP-2-NO<sub>2</sub>-5-OH-Py ( $\lambda_{\text{ex}} = 450$  nm)

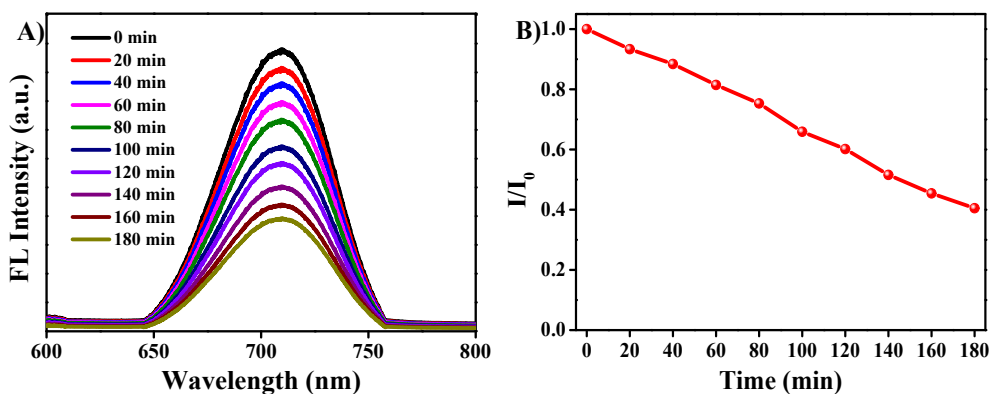

**Figure S5.** The photostability of SP-2-NO<sub>2</sub>-5-OH-Py under continuous illumination at 365 nm (10 W) ( $c = 10^{-5}$  M at water solution,  $\lambda_{\text{ex}}=450$  nm)

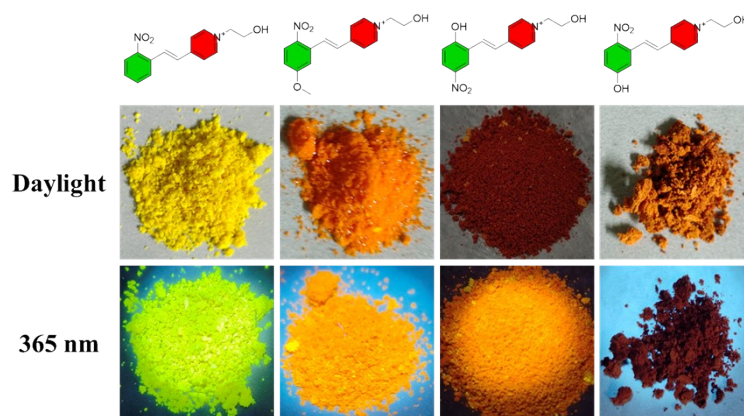

**Figure S6.** Optical images of SP-OH dyes in solid state under daylight and 365 nm UV irradiation, respectively.

**Table S1.** Photoluminescent characteristics of SP-2-NO<sub>2</sub>-Py in different solvents

| Solvent                          | $\lambda_{\text{abs}}^{\text{a}}/\text{nm}$ | $\lambda_{\text{em}}^{\text{a}}/\text{nm}$ | Stokes shift/nm | $\epsilon^{\text{b}} \times 10^4 (\text{M}^{-1} \cdot \text{cm}^{-1})$<br>1) | QY <sup>c</sup> /% |
|----------------------------------|---------------------------------------------|--------------------------------------------|-----------------|------------------------------------------------------------------------------|--------------------|
| DMSO                             | 352                                         | 580                                        | 228             | 3.88                                                                         | 2.4                |
| CH <sub>3</sub> CN               | 350                                         | 575                                        | 225             | 3.57                                                                         | 1.1                |
| DMF                              | 351                                         | 591                                        | 240             | 4.08                                                                         | 2.6                |
| CH <sub>3</sub> OH               | 351                                         | 560                                        | 209             | 3.73                                                                         | 1.8                |
| C <sub>2</sub> H <sub>5</sub> OH | 351                                         | 563                                        | 212             | 4.80                                                                         | 2.4                |
| CH <sub>2</sub> Cl <sub>2</sub>  | 351                                         | <i>n.d.</i>                                | <i>n.d.</i>     | 3.99                                                                         | <i>n.d.</i>        |
| CHCl <sub>3</sub>                | 351                                         | <i>n.d.</i>                                | <i>n.d.</i>     | 4.18                                                                         | <i>n.d.</i>        |

<sup>a</sup> SP-2-NO<sub>2</sub>-Py was dissolved in different solvents solution with a concentration of 10<sup>-5</sup> mol/L. <sup>b</sup> Molar extinction coefficients ( $\epsilon$ ) were measured at the absorption maximum. <sup>c</sup> Absolute photoluminescence quantum yields (QY) of dyes in DMF solution were determined by using the integrating sphere method. *n.d.*: too low to be detected.

**Table S2.** Photoluminescent characteristics of SP-2-NO<sub>2</sub>-5-OMe-Py in different solvents

| Solvent                          | $\lambda_{\text{abs}}^{\text{a}}/\text{nm}$ | $\lambda_{\text{em}}^{\text{a}}/\text{nm}$ | Stokes shift/nm | $\epsilon^{\text{b}} \times 10^4 (\text{M}^{-1} \cdot \text{cm}^{-1})$<br>1) | QY <sup>c</sup> /% |
|----------------------------------|---------------------------------------------|--------------------------------------------|-----------------|------------------------------------------------------------------------------|--------------------|
| DMSO                             | 312                                         | 558                                        | 246             | 5.83                                                                         | 11.4               |
| CH <sub>3</sub> CN               | 317                                         | 553                                        | 236             | 4.86                                                                         | 17.2               |
| DMF                              | 317                                         | 555                                        | 238             | 5.64                                                                         | 14.7               |
| CH <sub>3</sub> OH               | 316                                         | 551                                        | 235             | 5.36                                                                         | 18.3               |
| C <sub>2</sub> H <sub>5</sub> OH | 316                                         | 547                                        | 231             | 5.29                                                                         | 18.5               |
| CH <sub>2</sub> Cl <sub>2</sub>  | 319                                         | 537                                        | 218             | 5.21                                                                         | 13.6               |
| CHCl <sub>3</sub>                | 321                                         | 517                                        | 196             | 5.49                                                                         | 12.9               |

<sup>a</sup> SP-2-NO<sub>2</sub>-5-OMe-Py was dissolved in different solvents solution with a concentration of 10<sup>-5</sup> mol/L. <sup>b</sup> Molar extinction coefficients ( $\epsilon$ ) were measured at the absorption maximum. <sup>c</sup> Absolute

photoluminescence quantum yields (QY) of dyes in DMF solution were determined by using the integrating sphere method.

**Table S3.** Photoluminescent characteristics of SP-5-NO<sub>2</sub>-2-OH-Py in different solvents

| Solvent                          | $\lambda_{\text{abs}}^{\text{a}}/\text{nm}$ | $\lambda_{\text{em}}^{\text{a}}/\text{nm}$ | Stokes shift/nm | $\epsilon^{\text{b}} \times 10^4 (\text{M}^{-1} \cdot \text{cm}^{-1})$<br>1) | QY <sup>c</sup> /% |
|----------------------------------|---------------------------------------------|--------------------------------------------|-----------------|------------------------------------------------------------------------------|--------------------|
| DMSO                             | 321/424/509                                 | 640                                        | 319/216/131     | 1.59/1.58/2.52                                                               | 13.9               |
| CH <sub>3</sub> CN               | 332/413/507                                 | 640                                        | 308/227/133     | 1.15/0.86/1.41                                                               | 6.1                |
| DMF                              | 325/423/513                                 | 642                                        | 317/219/129     | 1.09/1.79/3.04                                                               | 9.2                |
| CH <sub>3</sub> OH               | 328/369/468                                 | 634                                        | 306/265/166     | 1.17/1.52/0.38                                                               | 8.4                |
| C <sub>2</sub> H <sub>5</sub> OH | 329/393/479                                 | 635                                        | 306/242/156     | 1.21/1.34/1.67                                                               | 11.3               |
| CH <sub>2</sub> Cl <sub>2</sub>  | 325/377                                     | 504/637                                    | 179/127/312/260 | 1.20/1.79                                                                    | 6.7                |
| CHCl <sub>3</sub>                | 321/376                                     | 479/644                                    | 158/103/323/268 | 1.44/2.02                                                                    | 6.2                |

<sup>a</sup> SP-5-NO<sub>2</sub>-2-OH-Py was dissolved in different solvents solution with a concentration of 10<sup>-5</sup> mol/L. <sup>b</sup> Molar extinction coefficients ( $\epsilon$ ) were measured at the absorption maximum. <sup>c</sup> Absolute photoluminescence quantum yields (QY) of dyes in DMF solution were determined by using the integrating sphere method.

**Table S4.** Photoluminescent characteristics of SP-2-NO<sub>2</sub>-5-OH-Py in different solvents

| Solvent                          | $\lambda_{\text{abs}}^{\text{a}}/\text{nm}$ | $\lambda_{\text{em}}^{\text{a}}/\text{nm}$ | Stokes shift/nm | $\epsilon^{\text{b}} \times 10^4 (\text{M}^{-1} \cdot \text{cm}^{-1})$ | QY <sup>c</sup> /% |
|----------------------------------|---------------------------------------------|--------------------------------------------|-----------------|------------------------------------------------------------------------|--------------------|
| DMSO                             | 306/330/429                                 | 601                                        | 295/271/172     | 7.98/6.92/0.81                                                         | 13.5               |
| CH <sub>3</sub> CN               | 300/325                                     | 588                                        | 288/263         | 6.37/5.60                                                              | 16.5               |
| DMF                              | 304/331/422                                 | 605                                        | 301/274/183     | 5.86/5.51/1.35                                                         | 6.6                |
| CH <sub>3</sub> OH               | 303/325                                     | 595                                        | 292/270         | 4.17/3.79                                                              | 24.1               |
| C <sub>2</sub> H <sub>5</sub> OH | 301/324                                     | 587                                        | 286/263         | 6.22/5.50                                                              | 29.7               |
| CH <sub>2</sub> Cl <sub>2</sub>  | 310/329                                     | 592                                        | 282/263         | 2.88/2.80                                                              | 4.9                |
| CHCl <sub>3</sub>                | 310/333                                     | 583                                        | 273/250         | 6.27/5.94                                                              | 5.3                |

<sup>a</sup> SP-2-NO<sub>2</sub>-5-OH-Py was dissolved in different solvents solution with a concentration of 10<sup>-5</sup> mol/L. <sup>b</sup> Molar extinction coefficients ( $\epsilon$ ) were measured at the absorption maximum. <sup>c</sup> Absolute photoluminescence quantum yields (QY) of dyes in DMF solution were determined by using the integrating sphere method.

**Table S5.** Photoluminescent characteristics of SP-2-NO<sub>2</sub>-Py in different pH

| pH | $\lambda^{\text{a}}_{\text{abs}}/\text{nm}$ | $\lambda^{\text{a}}_{\text{em}}/\text{nm}$ | Stokes shift/nm | $\epsilon^{\text{b}} \times 10^4 (\text{M}^{-1} \cdot \text{cm}^{-1})$ | QY <sup>c</sup> /% |
|----|---------------------------------------------|--------------------------------------------|-----------------|------------------------------------------------------------------------|--------------------|
| 1  | 313                                         | 477                                        | 164             | 2.92                                                                   | 0.53               |
| 2  | 313                                         | 473                                        | 160             | 3.22                                                                   | 0.89               |
| 3  | 313                                         | 466                                        | 153             | 3.38                                                                   | 1.07               |
| 4  | 313                                         | 466                                        | 153             | 3.07                                                                   | 0.98               |
| 5  | 313                                         | 403/466                                    | 90/153          | 2.98                                                                   | 0.86               |
| 6  | 313                                         | 403/466                                    | 90/153          | 3.04                                                                   | 0.81               |
| 7  | 313                                         | 414/468                                    | 101/155         | 3.09                                                                   | 0.80               |
| 8  | 313                                         | 414/468                                    | 101/155         | 3.35                                                                   | 0.74               |
| 9  | 313                                         | 414/468                                    | 101/155         | 3.19                                                                   | 0.74               |
| 10 | 313                                         | 412/499                                    | 99/186          | 3.31                                                                   | 0.65               |
| 11 | 313                                         | 408/537                                    | 95/224          | 3.12                                                                   | 0.58               |
| 12 | 307                                         | 408/538                                    | 101/231         | 3.28                                                                   | 0.59               |
| 13 | 307                                         | 408/540                                    | 101/233         | 2.96                                                                   | 0.61               |
| 14 | 307                                         | 412/520                                    | 105/213         | 3.04                                                                   | 0.64               |

<sup>a</sup> SP-2-NO<sub>2</sub>-Py was dissolved in different pH aqueous solution with a concentration of 10<sup>-5</sup> mol/L.

<sup>b</sup> Molar extinction coefficients ( $\epsilon$ ) were measured at the absorption maximum. <sup>c</sup> Absolute photoluminescence quantum yields (QY) of dyes in DMF solution were determined by using the integrating sphere method.

**Table S6.** Photoluminescent characteristics of SP-2-NO<sub>2</sub>-5-OMe-Py in different pH

| pH | $\lambda_{\text{abs}}^{\text{a}}/\text{nm}$ | $\lambda_{\text{em}}^{\text{a}}/\text{nm}$ | Stokes shift/nm | $\epsilon^{\text{b}} \times 10^4 (\text{M}^{-1} \cdot \text{cm}^{-1})$ | QY <sup>c</sup> /% |
|----|---------------------------------------------|--------------------------------------------|-----------------|------------------------------------------------------------------------|--------------------|
| 1  | 315                                         | 518                                        | 203             | 7.46                                                                   | 2.5                |
| 2  | 316                                         | 518                                        | 202             | 7.64                                                                   | 2.4                |
| 3  | 317                                         | 518                                        | 201             | 7.58                                                                   | 2.5                |
| 4  | 317                                         | 525                                        | 208             | 7.64                                                                   | 2.7                |
| 5  | 319                                         | 552                                        | 233             | 7.63                                                                   | 4.2                |
| 6  | 319                                         | 555                                        | 236             | 7.70                                                                   | 4.3                |
| 7  | 319                                         | 553                                        | 234             | 8.29                                                                   | 4.3                |
| 8  | 319                                         | 555                                        | 236             | 6.83                                                                   | 4.4                |
| 9  | 320                                         | 555                                        | 235             | 7.18                                                                   | 3.9                |
| 10 | 320                                         | 555                                        | 235             | 6.95                                                                   | 4.3                |
| 11 | 320                                         | 555                                        | 235             | 6.55                                                                   | 4.4                |
| 12 | 319                                         | 555                                        | 236             | 6.86                                                                   | 4.0                |
| 13 | 306                                         | 555                                        | 249             | 6.26                                                                   | 3.7                |
| 14 | 295                                         | 548                                        | 253             | 7.11                                                                   | 3.2                |

<sup>a</sup> SP-2-NO<sub>2</sub>-5-OMe-Py was dissolved in different pH aqueous solution with a concentration of 10<sup>-5</sup> mol/L. <sup>b</sup> Molar extinction coefficients ( $\epsilon$ ) were measured at the absorption maximum. <sup>c</sup> Absolute photoluminescence quantum yields (QY) of dyes in DMF solution were determined by using the integrating sphere method.

**Table S7.** Photoluminescent characteristics of SP-5-NO<sub>2</sub>-2-OH-Py in different pH

| pH | $\lambda_{\text{abs}}^{\text{a}}/\text{nm}$ | $\lambda_{\text{em}}^{\text{a}}/\text{nm}$ | Stokes shift/nm | $\epsilon^{\text{b}} \times 10^4 (\text{M}^{-1}\cdot\text{cm}^{-1})$ | QY <sup>c</sup> /% |
|----|---------------------------------------------|--------------------------------------------|-----------------|----------------------------------------------------------------------|--------------------|
| 1  | 316/351                                     | 607                                        | 291/256         | 2.91/3.17                                                            | 3.8                |
| 2  | 315/351                                     | 607                                        | 292/256         | 2.73/2.98                                                            | 4.1                |
| 3  | 315/352                                     | 607                                        | 292/255         | 2.52/2.77                                                            | 3.9                |
| 4  | 316/352/441                                 | 607                                        | 291/255/166     | 3.09/3.28/0.32                                                       | 4.2                |
| 5  | 316/351/441                                 | 608                                        | 292/257/167     | 2.84/3.02/0.29                                                       | 4.5                |
| 6  | 316/352/441                                 | 608                                        | 292/256/167     | 2.61/2.77/0.27                                                       | 4.3                |
| 7  | 319/366/441                                 | 608                                        | 289/242/167     | 2.70/2.53/1.21                                                       | 4.4                |
| 8  | 319/379/441                                 | 608                                        | 289/229/167     | 2.69/2.51/1.92                                                       | 4.5                |
| 9  | 319/380/442                                 | 608                                        | 289/228/166     | 2.86/2.69/2.08                                                       | 4.5                |
| 10 | 319/400/441                                 | 608                                        | 289/208/167     | 2.58/3.16/3.29                                                       | 4.8                |
| 11 | 319/405/441                                 | 608                                        | 289/203/167     | 1.79/2.57/2.72                                                       | 4.7                |
| 12 | 319/405/441                                 | 608                                        | 289/203/167     | 2.94/4.05/4.31                                                       | 4.9                |
| 13 | 319/405/441                                 | 608                                        | 289/203/167     | 1.46/2.12/2.25                                                       | 4.4                |
| 14 | 318/404/438                                 | 603                                        | 285/199/165     | 1.57/2.21/2.29                                                       | 4.1                |

<sup>a</sup> SP-5-NO<sub>2</sub>-2-OH-Py was dissolved in different pH aqueous solution with a concentration of 10<sup>-5</sup> mol/L. <sup>b</sup> Molar extinction coefficients ( $\epsilon$ ) were measured at the absorption maximum. <sup>c</sup> Absolute photoluminescence quantum yields (QY) of dyes in DMF solution were determined by using the integrating sphere method.

**Table S8.** Photoluminescent characteristics of SP-2-NO<sub>2</sub>-5-OH-Py in different pH

| pH | $\lambda_{\text{abs}}^{\text{a}}/\text{nm}$ | $\lambda_{\text{em}}^{\text{a}}/\text{nm}$ | Stokes shift/nm | $\epsilon^{\text{b}} \times 10^4 (\text{M}^{-1}\cdot\text{cm}^{-1})$ | QY <sup>c</sup> /% |
|----|---------------------------------------------|--------------------------------------------|-----------------|----------------------------------------------------------------------|--------------------|
| 1  | 305                                         | 707                                        | 402             | 7.79                                                                 | 0.4                |
| 2  | 305                                         | 707                                        | 402             | 6.22                                                                 | 0.3                |
| 3  | 305                                         | 707                                        | 402             | 6.15                                                                 | 0.4                |
| 4  | 305                                         | 709                                        | 404             | 4.99                                                                 | 1.1                |
| 5  | 305                                         | 707                                        | 402             | 5.56                                                                 | 2.1                |
| 6  | 305                                         | 707                                        | 402             | 5.52                                                                 | 3.7                |
| 7  | 305                                         | 709                                        | 404             | 7.06                                                                 | 1.9                |
| 8  | 305                                         | 708                                        | 403             | 8.66                                                                 | 3.2                |
| 9  | 308/327/411                                 | 707                                        | 399/380/296     | 4.28/4.38/2.31                                                       | 1.5                |
| 10 | 331/411                                     | 706                                        | 375/295         | 4.64/3.25                                                            | 1.7                |
| 11 | 331/411                                     | 706                                        | 375/295         | 5.88/5.01                                                            | 1.3                |
| 12 | 331/411                                     | 707                                        | 376/296         | 7.42/6.21                                                            | 0.8                |
| 13 | 329/411                                     | 707                                        | 378/296         | 6.57/5.37                                                            | 0.3                |
| 14 | 329/414                                     | 706                                        | 377/292         | 9.83/7.93                                                            | 0.2                |

<sup>a</sup> SP-2-NO<sub>2</sub>-5-OH-Py was dissolved in different pH aqueous solution with a concentration of 10<sup>-5</sup> mol/L. <sup>b</sup> Molar extinction coefficients ( $\epsilon$ ) were measured at the absorption maximum. <sup>c</sup> Absolute photoluminescence quantum yields (QY) of dyes in DMF solution were determined by using the integrating sphere method.

### 3. Density functional theory (DFT) calculations

The ground state structures of all SP-OH dyes were optimized by using B3LYP/6-311+G (d, p) level. The time-dependent density functional theory (TD-DFT) calculation used the B3LYP/6-311+G (d, p) method based on their optimized S<sub>0</sub> geometries. All the calculations were performed in Gaussian 09. The natural transition orbitals were analyzed using Multiwfn 3.8<sup>[1-4]</sup>.

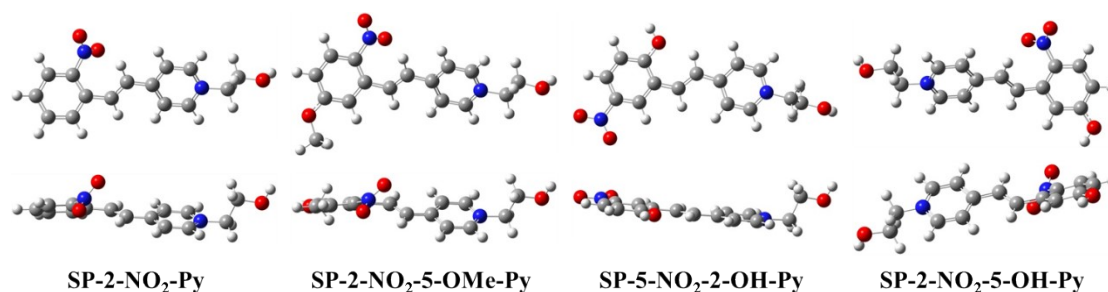**Figure S7.** Ground-state molecular configurations of the optimized SP-OH dyes at different angles

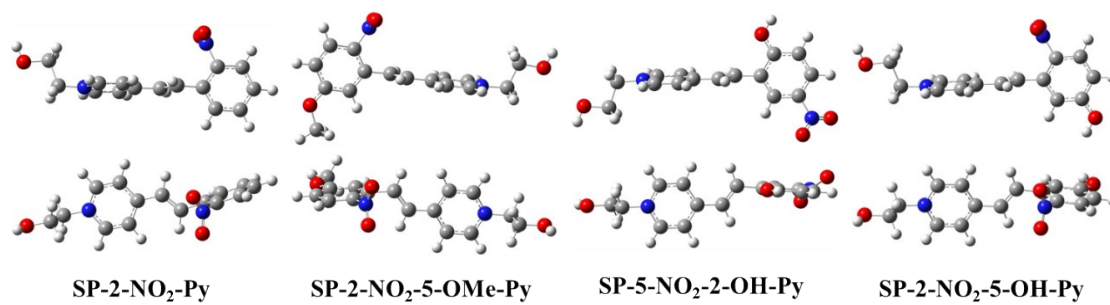

**Figure S8.** Excited-state molecular configurations of the optimized SP-OH dyes at different angles

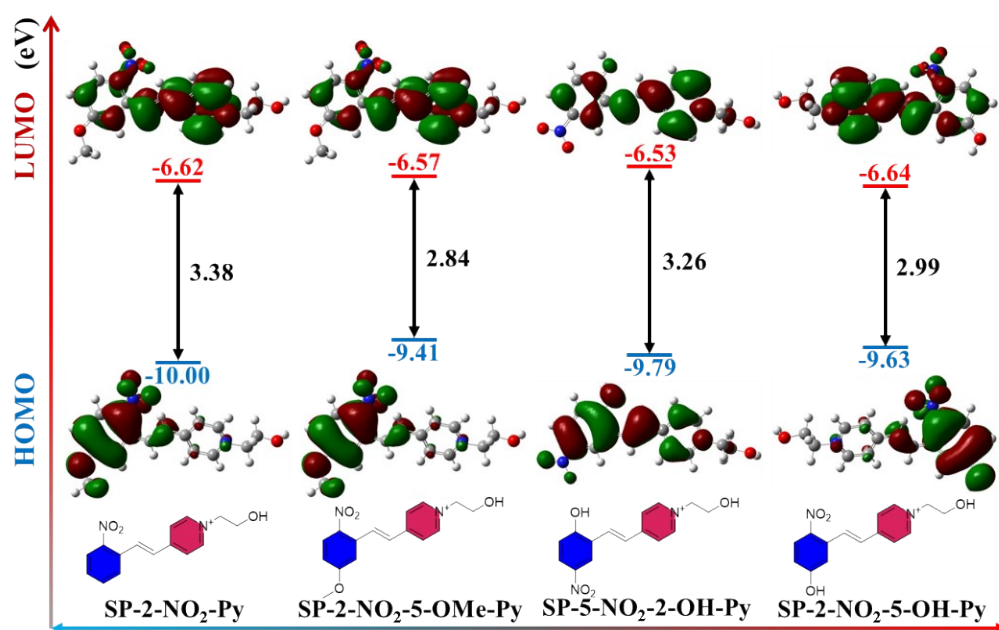

**Figure S9.** Ground-state HOMO-LUMO energy levels and molecular orbitals of SP-OH dyes

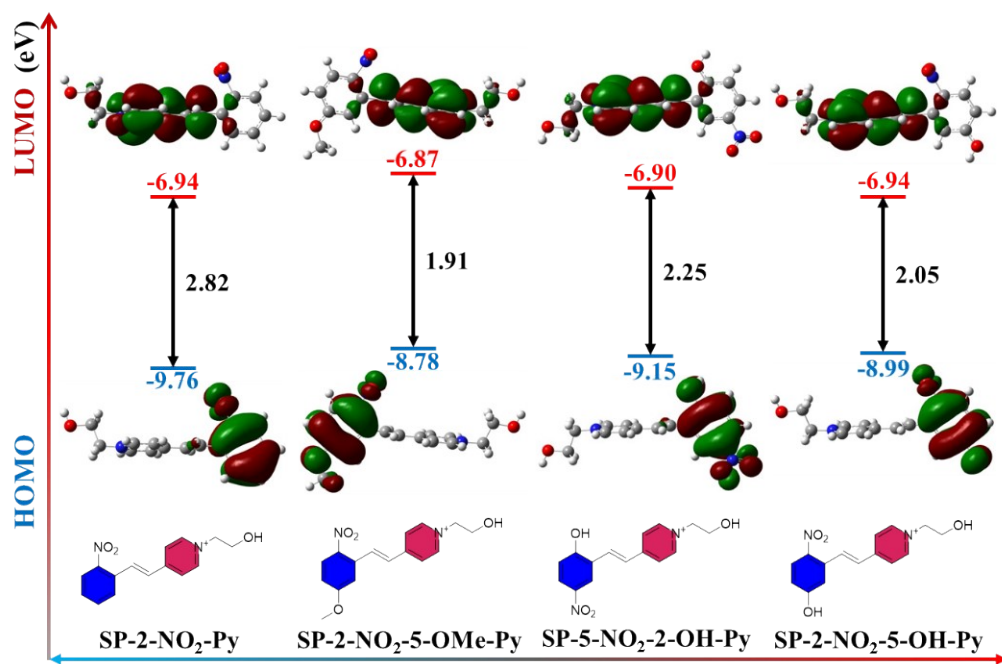

**Figure S10.** Excited-state HOMO-LUMO energy levels and molecular orbitals of SP-OH dyes

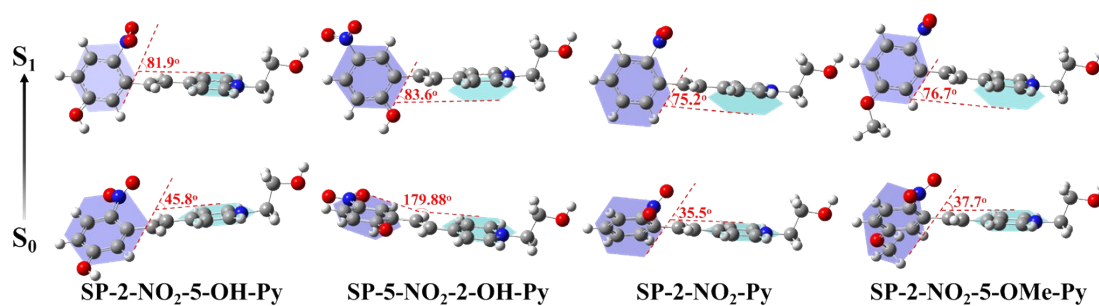

**Figure S11.** The molecular geometries and dihedral angle of SP-OH dyes in the ground state (S<sub>0</sub>) and the excited state (S<sub>1</sub>)

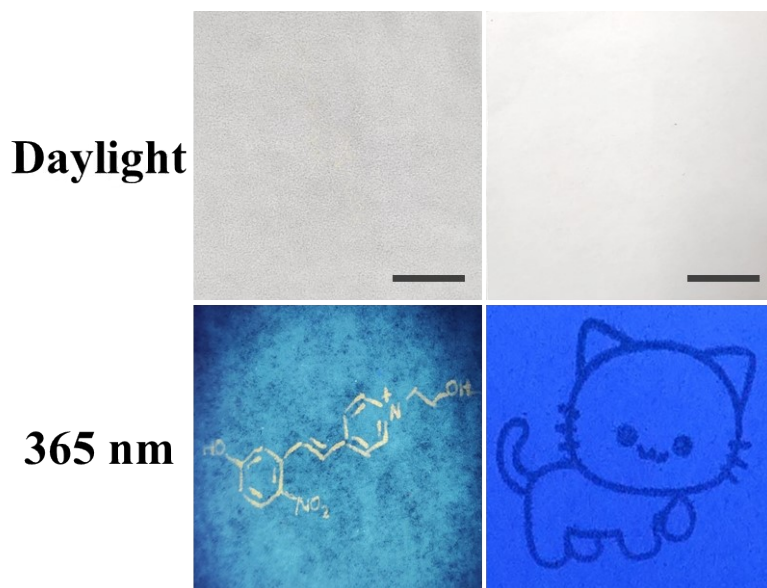

**Fig. S12.** Typical optical images of the SP-2-NO<sub>2</sub>-5-OH-Py dye anti-counterfeiting pattern drawn on weighing paper (Left) and printing paper (Right). Scale bar: 0.5 cm.

## 4. Syntheses and characterization

### 4.1 Synthesis of compound 1-(2-Hydroxyethyl)-4-methylpyridin-1-ium bromide

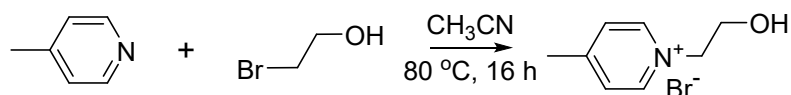

**Scheme S1.** Synthesis route of compound 1-(2-Hydroxyethyl)-4-methylpyridin-1-ium bromide

4-methylpyridine (0.465 g, 5 mmol) and 2-bromoethanol (0.625 g, 5 mmol) were dissolved in anhydrous acetonitrile (50 mL). The reaction mixture was heated at 80 °C under reflux for 16 h. After the reaction was completed and returned to room temperature. The solvent was removed by reducing pressure concentration to afford the product as a pale-yellow oil (1.063 g, 92.37% yield), which was used directly in the next reaction without further purification. <sup>1</sup>H NMR (400 MHz, DMSO-*d*<sub>6</sub>): δ(ppm) 2.54 (s, 3H), 3.76 (t, *J*=8 Hz, 2H), 4.63 (t, *J*=12 Hz, 2H), 5.16 (s, 1H), 7.95 (d, *J*=8 Hz, 2H), 8.90 (d, *J*=8 Hz, 2H). <sup>13</sup>C NMR (100 MHz, DMSO-*d*<sub>6</sub>): δ(ppm) 21.87, 48.94, 60.39, 62.43, 128.35, 144.51, 159.18.

### 4.2 General procedure for the synthesis of SP-OH dyes

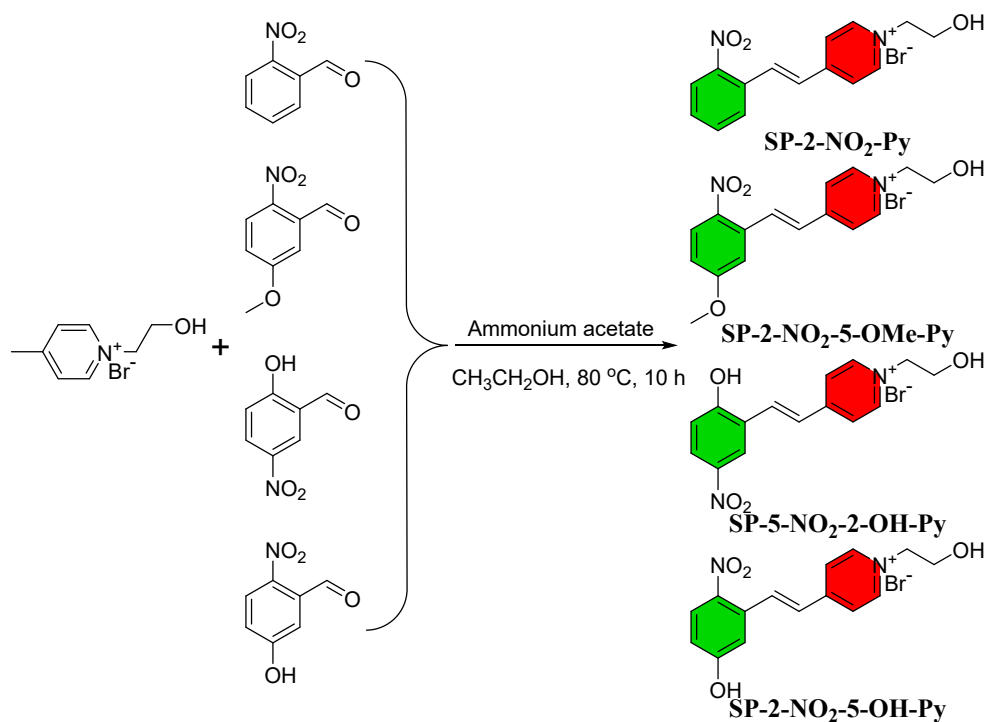

**Scheme S2.** Synthesis route of SP-OH dyes through the Knoevenagel reaction

1-(2-Hydroxyethyl)-4-methylpyridinium bromide (1.0 equiv) and 2-Nitrobenzaldehyde derivatives or 5-Nitrosalicylaldehyde (1.0 equiv) were added in a sufficient volume of anhydrous ethanol to fully dissolve the reactants. The reaction mixture was heated under an argon atmosphere at 80 °C for 10 min. Ammonium acetate (0.05 equiv) was then added in one portion. The resulting mixture was maintained under argon at 80 °C and stirred for a further 10 h until complete consumption of the starting material was observed by TLC. After the reaction was completed, the ambient temperature was restored. Then the excess ethanol was removed by reducing pressure concentration, and the crude product was further purified by silica gel column chromatography (Dichloromethane: Methanol=20:1~10:1, v/v).

Compound **SP-2-NO<sub>2</sub>-Py** was obtained as orange-yellow solid (71.25 mg, 20.34%). <sup>1</sup>H NMR (400 MHz, DMSO-*d*<sub>6</sub>): δ(ppm) 3.83 (t, *J*=12 Hz, 2H), 4.59 (t, *J*=8 Hz, 2H), 6.85 (t, *J*=16 Hz, 1H), 7.00 (d, *J*=8 Hz, 1H), 7.24 (t, *J*=16 Hz, 1H), 7.52 (d, *J*=16 Hz, 1H), 7.66 (d, *J*=8 Hz, 1H), 8.04 (d, *J*=20 Hz, 1H), 8.21 (d, *J*=8 Hz, 2H), 8.85 (d, *J*=8 Hz, 2H). <sup>13</sup>C NMR (100 MHz, DMSO-*d*<sub>6</sub>): δ(ppm) 21.87, 60.52, 62.26, 116.95, 119.89, 122.38, 123.22, 123.64, 128.40, 129.32, 132.17, 137.12, 144.92, 154.03, 157.56. HRMS: calculated for C<sub>15</sub>H<sub>15</sub>N<sub>2</sub>O<sub>3</sub>Br [M+H]<sup>+</sup>: 352.02, found 352.04.

Compound **SP-2-NO<sub>2</sub>-5-OMe-Py** was obtained as orange solid (38.53 mg, 12.82%).

**<sup>1</sup>H NMR** (400 MHz, DMSO-*d*<sub>6</sub>): δ(ppm) 3.74 (t, *J*=60 Hz, 5H), 4.55 (d, *J*=12 Hz, 2H), 6.86 (t, *J*=16 Hz, 1H), 7.02 (d, *J*=8 Hz, 1H), 7.30 (d, *J*=8 Hz, 1H), 7.49 (d, *J*=16 Hz, 1H), 8.08 (d, *J*=16 Hz, 1H), 8.23 (d, *J*=8 Hz, 2H), 8.85 (d, *J*=4 Hz, 2H). **<sup>13</sup>C NMR** (100 MHz, DMSO-*d*<sub>6</sub>): δ(ppm) 56.53, 60.53, 62.35, 113.93, 119.75, 120.24, 122.63, 123.52, 123.76, 136.57, 145.01, 146.65, 148.56, 153.83. HRMS: calculated for C<sub>16</sub>H<sub>17</sub>N<sub>2</sub>O<sub>4</sub>Br [M+H]<sup>+</sup>: 382.03, found 380.24.

Compound **SP-5-NO<sub>2</sub>-2-OH-Py** was obtained as bright-red solid (261.55 mg, 71.23%). **<sup>1</sup>H NMR** (400 MHz, DMSO-*d*<sub>6</sub>): δ(ppm) 3.84 (t, *J*=8 Hz, 2H), 4.57 (t, *J*=8 Hz, 2H), 7.08 (d, *J*=8 Hz, 1H), 7.39 (d, *J*=16 Hz, 1H), 7.60 (d, *J*=8 Hz, 1H), 7.96 (m, 2H), 8.18 (d, *J*=8 Hz, 2H), 8.87 (d, *J*=8 Hz, 2H). **<sup>13</sup>C NMR** (100 MHz, DMSO-*d*<sub>6</sub>): δ(ppm) 60.48, 62.50, 117.35, 122.97, 124.21, 125.36, 126.13, 127.15, 134.77, 140.32, 145.23, 153.31, 163.07. HRMS: calculated for C<sub>15</sub>H<sub>15</sub>N<sub>2</sub>O<sub>4</sub>Br [M+H]<sup>+</sup>: 368.02, found 366.00.

Compound **SP-2-NO<sub>2</sub>-5-OH-Py** was obtained as dark orange solid (213.89 mg, 58.25%). **<sup>1</sup>H NMR** (400 MHz, DMSO-*d*<sub>6</sub>): δ(ppm) 3.83 (t, *J*=8 Hz, 2H), 4.56 (t, *J*=8 Hz, 2H), 6.71 (t, *J*=16 Hz, 1H), 6.87 (d, *J*=8 Hz, 1H), 7.15 (d, *J*=8 Hz, 1H), 7.44 (d, *J*=16 Hz, 1H), 8.07 (d, *J*=16 Hz, 1H), 8.20 (d, *J*=8 Hz, 2H), 8.82 (d, *J*=4 Hz, 2H). **<sup>13</sup>C NMR** (100 MHz, DMSO-*d*<sub>6</sub>): δ(ppm) 60.53, 62.77, 115.80, 117.31, 124.67, 127.46, 128.46, 134.53, 137.54, 140.15, 145.55, 152.57, 163.09. HRMS: calculated for C<sub>15</sub>H<sub>15</sub>N<sub>2</sub>O<sub>4</sub>Br [M+H]<sup>+</sup>: 368.02, found 366.28.

## 5. Supplemental Spectra

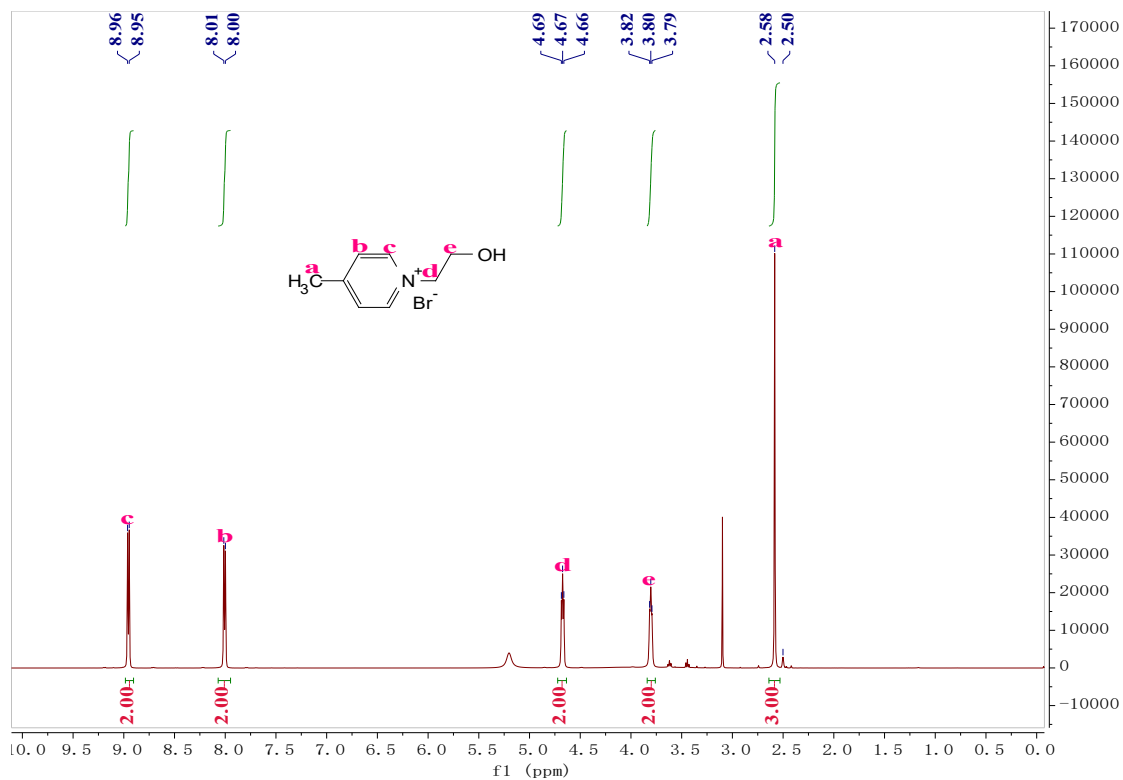

Fig. S13.  $^1\text{H}$  NMR spectrum of 1-(2-Hydroxyethyl)-4-methylpyridin-1-ium bromide

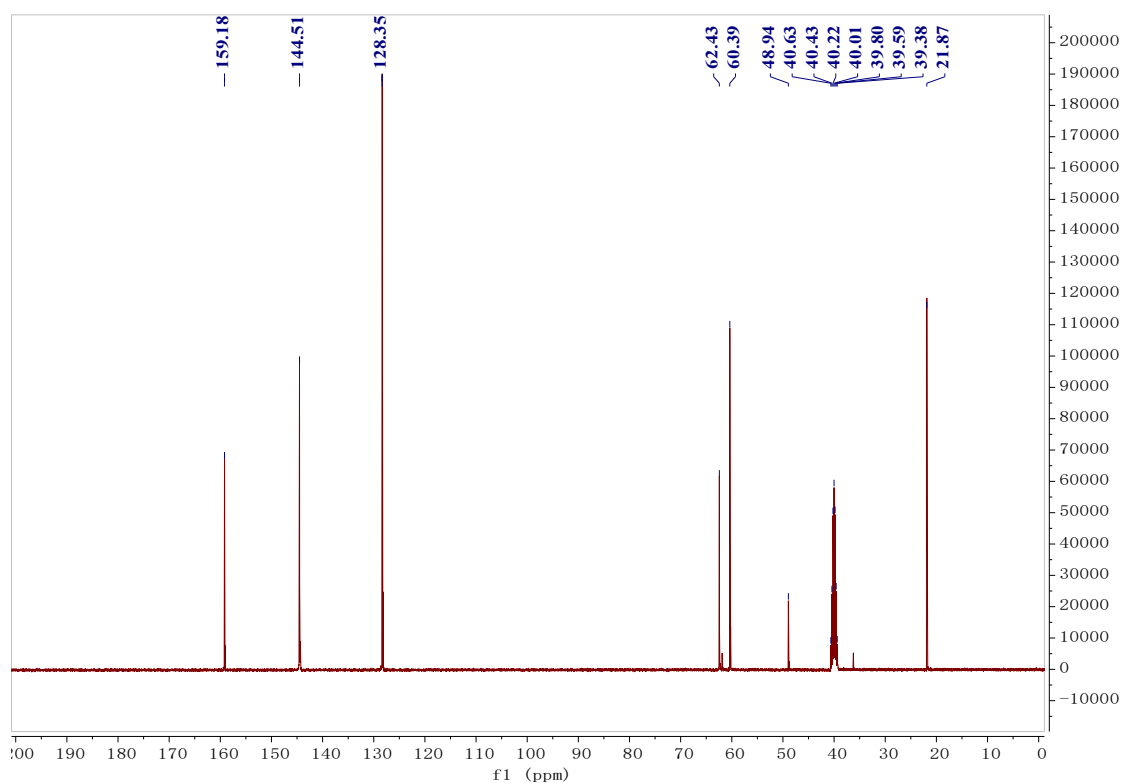

Fig. S14.  $^{13}\text{C}$  NMR spectrum of 1-(2-Hydroxyethyl)-4-methylpyridin-1-ium bromide

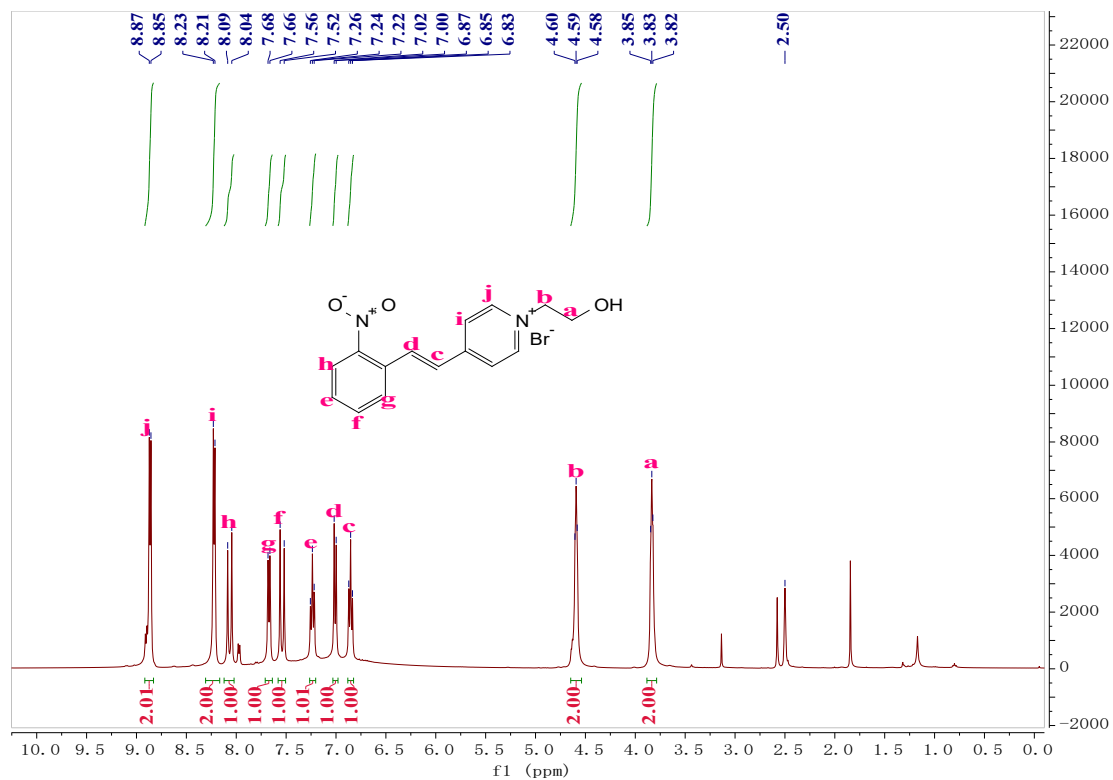

Fig. S15. <sup>1</sup>H NMR spectrum of compound SP-2-NO<sub>2</sub>-Py

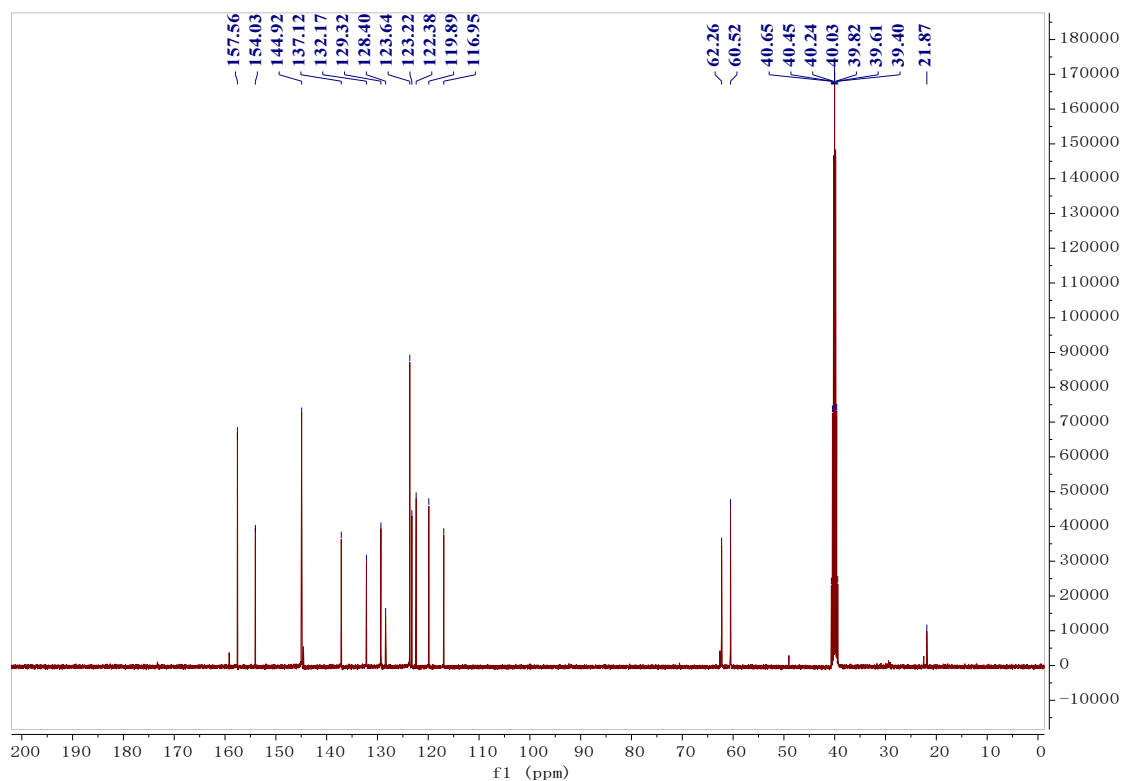

Fig. S16. <sup>13</sup>C NMR spectrum of compound SP-2-NO<sub>2</sub>-Py

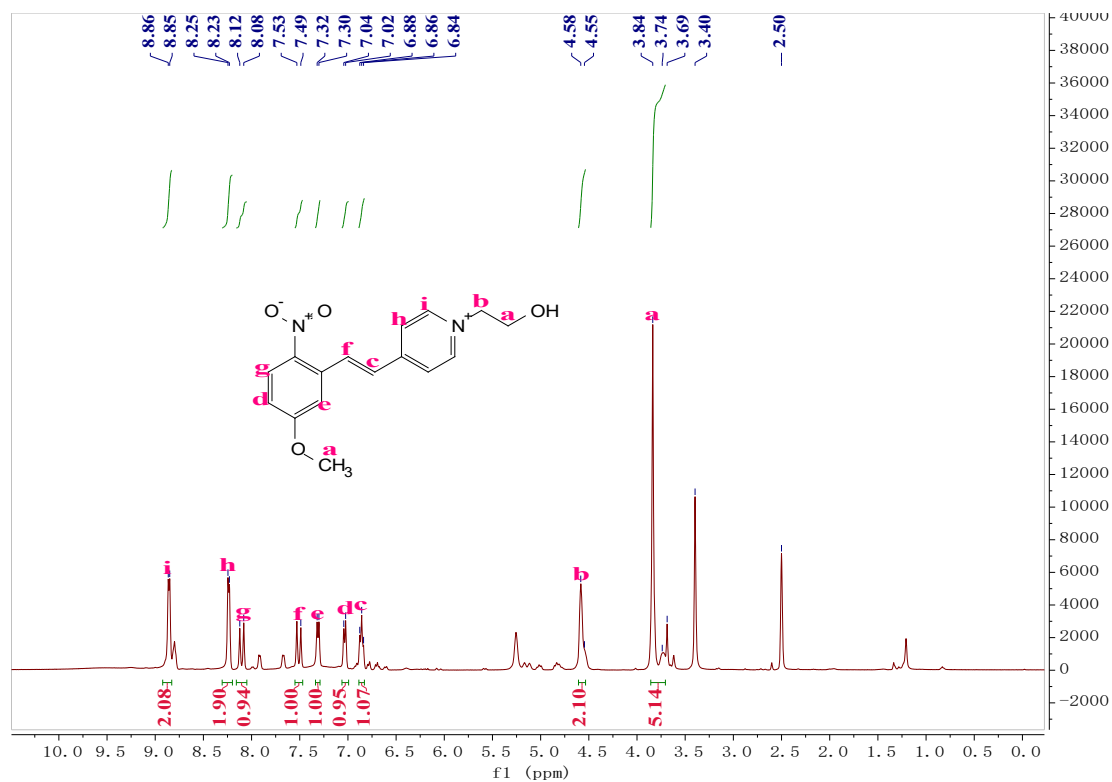

Fig. S17. <sup>1</sup>H NMR spectrum of compound SP-2-NO<sub>2</sub>-5-OMe-Py

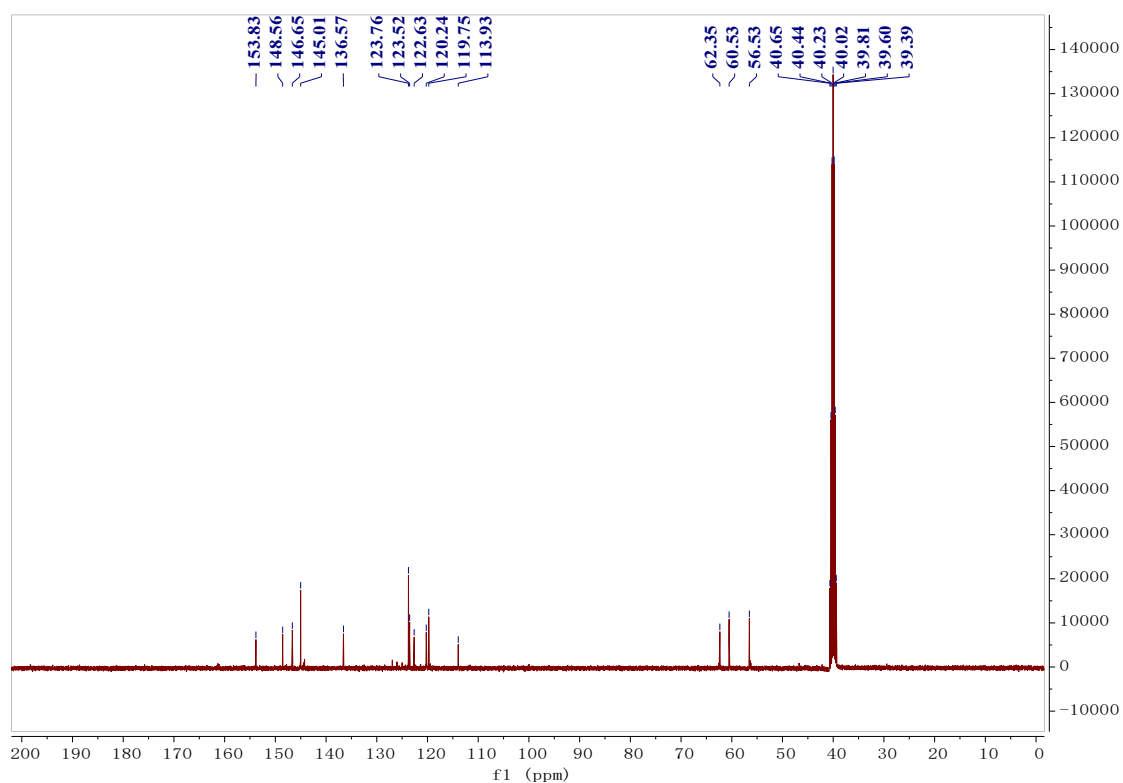

Fig. S18. <sup>13</sup>C NMR spectrum of compound SP-2-NO<sub>2</sub>-5-OMe-Py

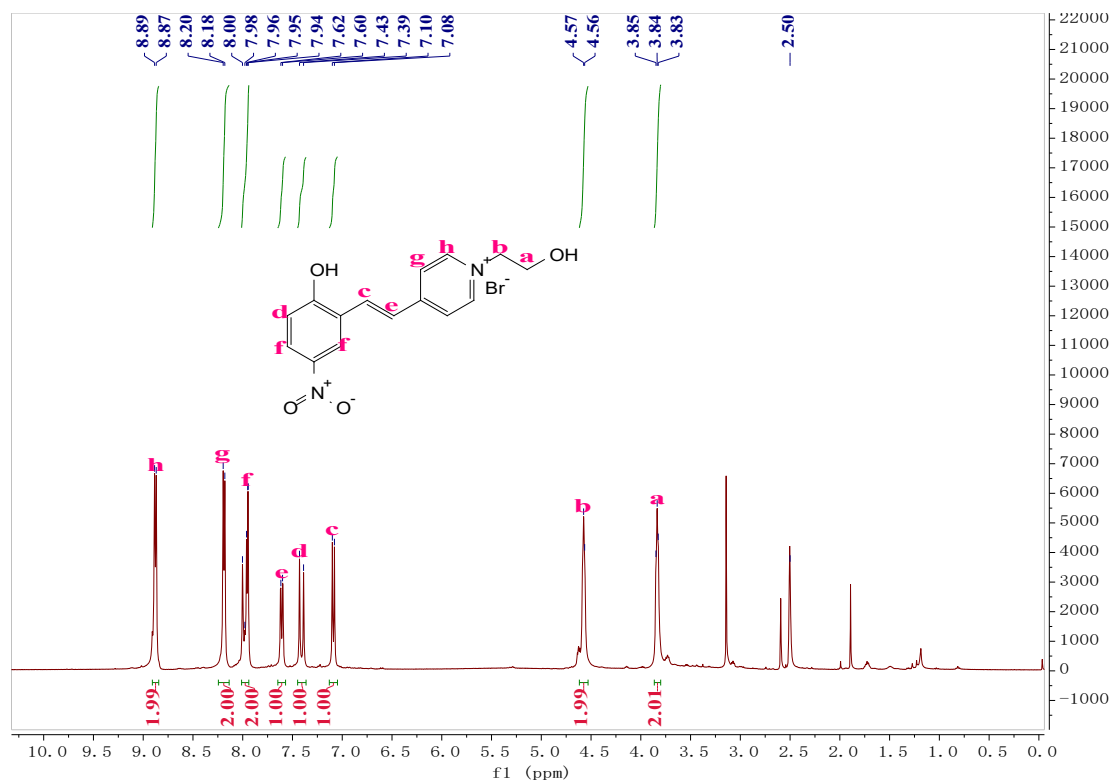

Fig. S19. <sup>1</sup>H NMR spectrum of compound SP-5-NO<sub>2</sub>-2-OH-Py

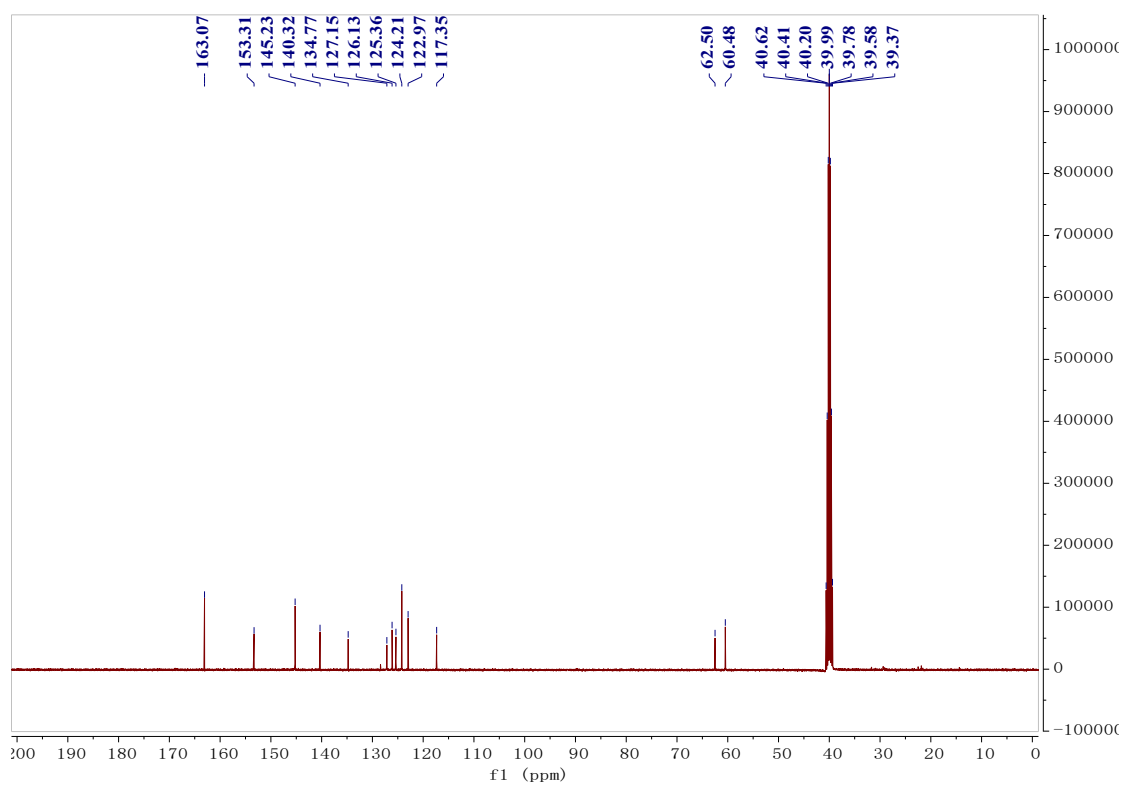

Fig. S20. <sup>13</sup>C NMR spectrum of compound SP-5-NO<sub>2</sub>-2-OH-Py

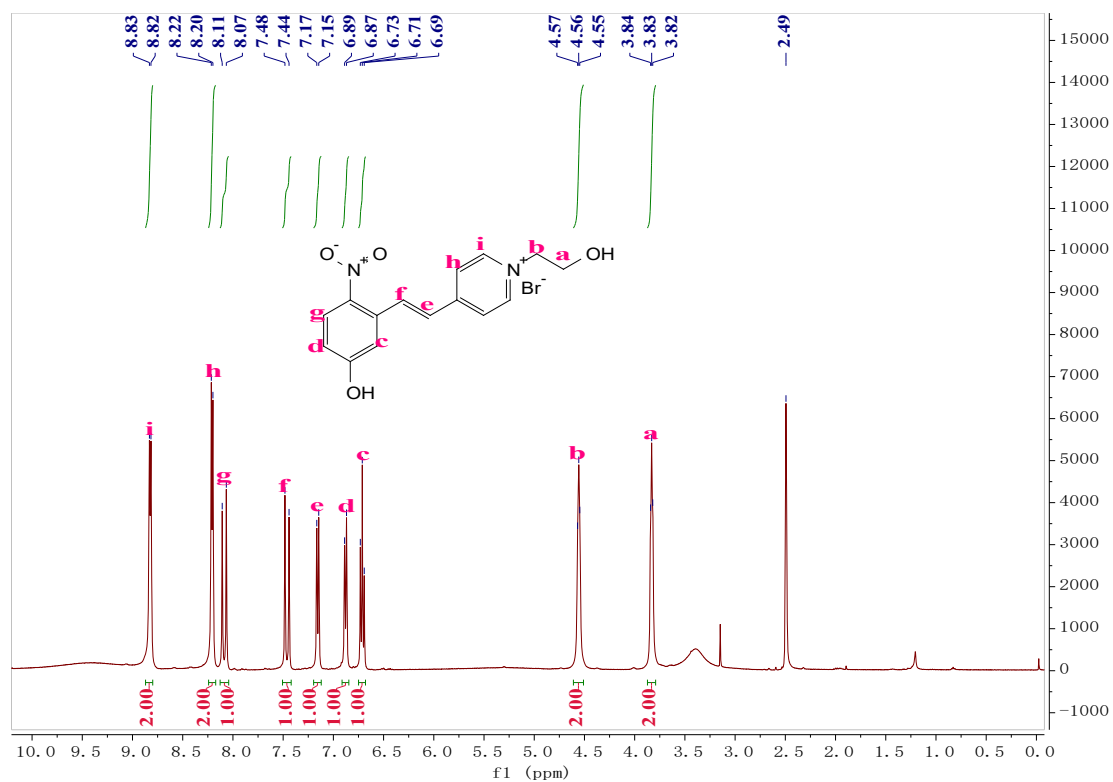

Fig. S21. <sup>1</sup>H NMR spectrum of compound SP-2-NO<sub>2</sub>-5-OH-Py

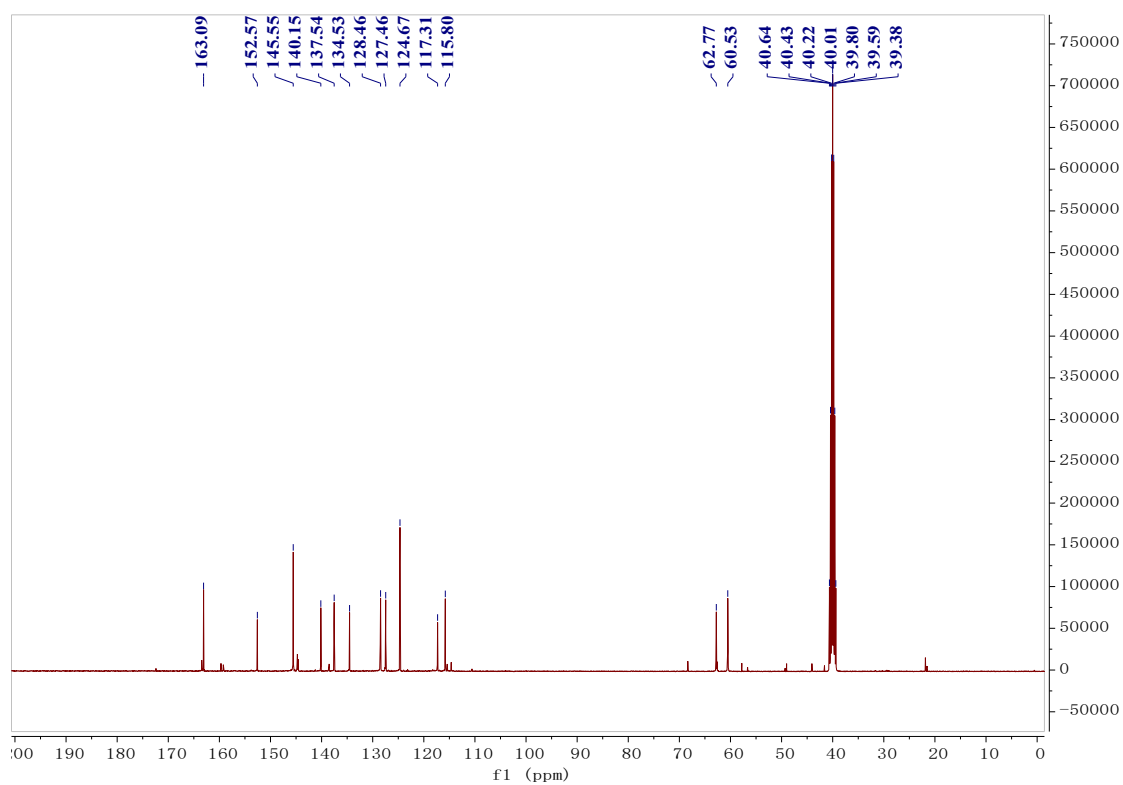

Fig. S22. <sup>13</sup>C NMR spectrum of compound SP-2-NO<sub>2</sub>-5-OH-Py

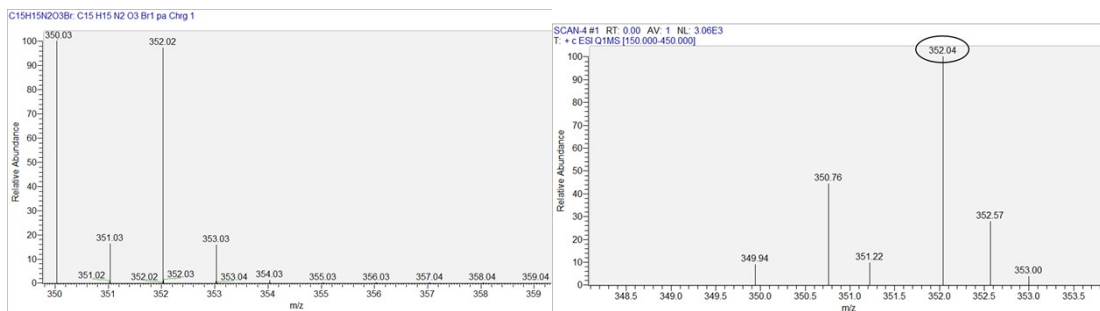

Fig. S23. The high-resolution mass spectrometry of SP-2-NO<sub>2</sub>-Py

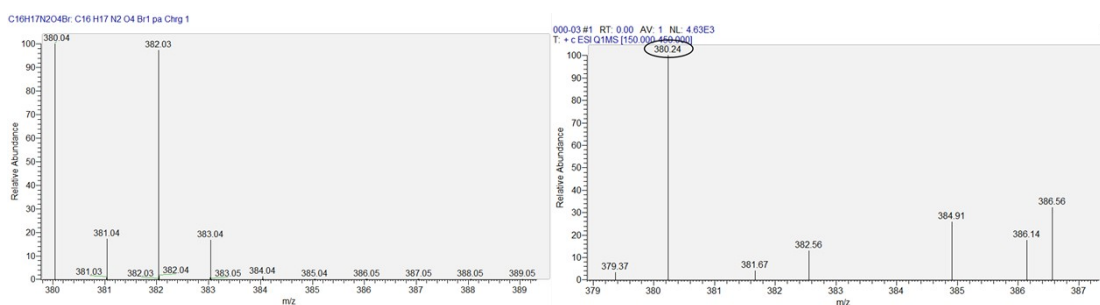

Fig. S24. The high-resolution mass spectrometry of SP-2-NO<sub>2</sub>-5-OMe-Py

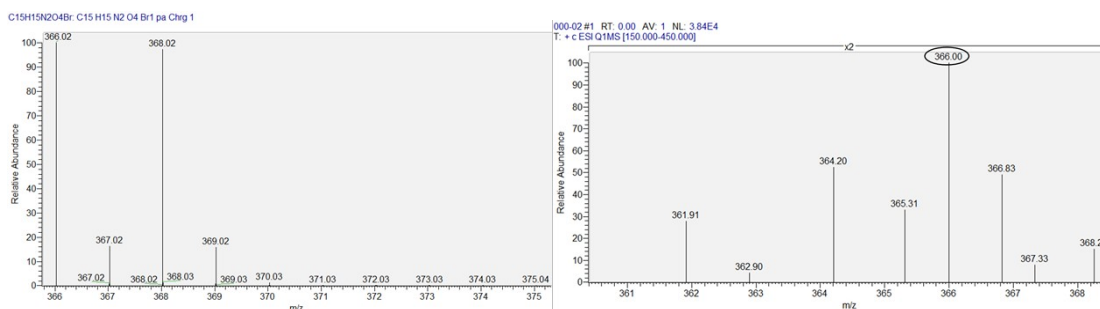

Fig. S25. The high-resolution mass spectrometry of SP-5-NO<sub>2</sub>-2-OH-Py

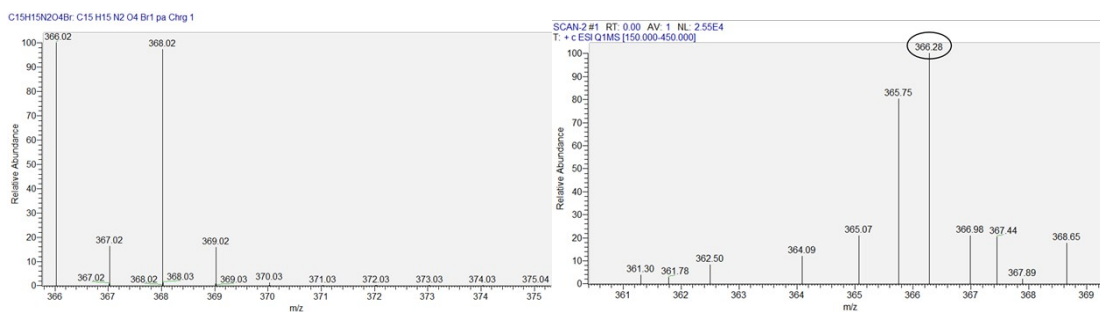

Fig. S26. The high-resolution mass spectrometry of SP-2-NO<sub>2</sub>-5-OH-Py

## 6. References

- [1] Tian Lu, Fei-Wu Chen. Multiwfn: A multifunctional wavefunction analyzer. *Journal of Computational Chemistry*, 2012, **33**, 580-592.
- [2] Tian Lu. A comprehensive electron wavefunction analysis toolbox for chemists, Multiwfn. *The Journal of Chemical Physics*, 2024, **161**, 082503.
- [3] Saeedreza Emamian, Tian Lu, Holger Kruse, Hamidreza Emamian. Exploring nature and predicting strength of hydrogen bond: A correlation analysis between atoms-in-molecules descriptors, binding energies, and energy components of symmetry-adapted perturbation theory. *Journal of Computational Chemistry*, 2019, **40**, 2868-2881.
- [4] Tian Lu, Qin-Xue Chen. Independent gradient model based on Hirshfeld partition: A new method for visual study of interactions in chemical systems. *Journal of Computational Chemistry*, 2022, **43**, 539-555.
